# Supplementary material for: Impact of oral probiotic Lactobacillus acidophilus vaccine strains on the immune response and gut microbiome of mice
Source: PLOS journal article supplement (doi:10.1371/journal.pone.0225842), 2019-12-12
Supplement: S9 (10.1371/journal.pone.0225842.s009) [file journal.pone.0225842.s009]

**A**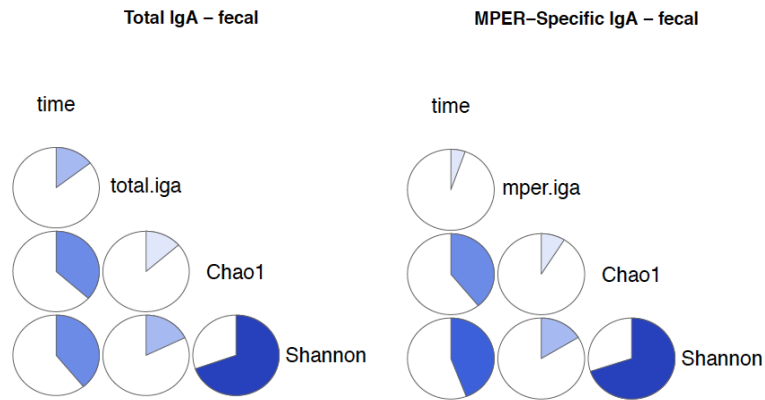**B**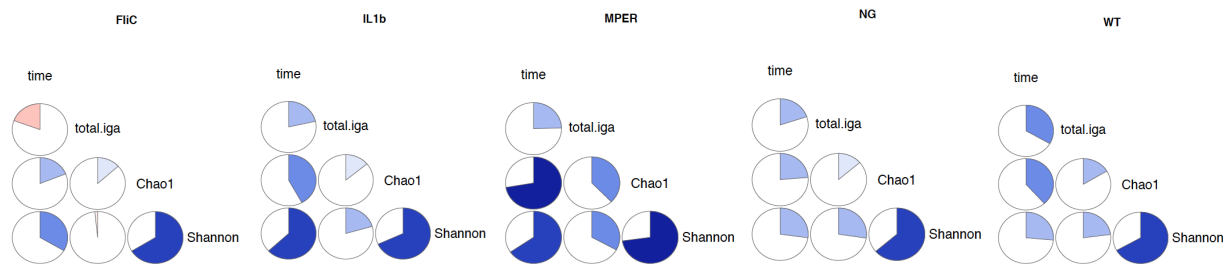**C**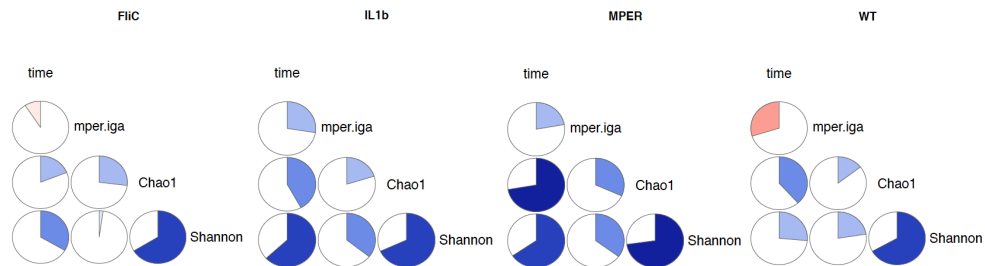

**S9 Fig.** Pie charts representing Spearman correlation between the Chao1 richness, Shannon diversity, time and total IgA and MPER-specific IgA, separately, for both the (A) combined data and per treatment for (B) total-IgA and (C) MPER-specific samples.
